# Supplementary material
Source: publisher figshare collection journal article supplement (https://sage.figshare.com/ndownloader/files/20225388)
Supplement: Supplementary file 1 [file 20225388]

| Patients                                                     | Full Treatment Response Achieved (n = 79) | Full Treatment Response Not Achieved (n = 237) | p      |
|--------------------------------------------------------------|-------------------------------------------|------------------------------------------------|--------|
| Age, mean $\pm$ SD                                           | 44.92 $\pm$ 12.55                         | 46.29 $\pm$ 2.75                               | 0.005  |
| >40 years, % (proportion)                                    | 63.3% (81/128)                            | 46.9% (30/64)                                  | 0.03   |
| Male, % (proportion)                                         | 77.3% (99/128)                            | 85.9% (55/64)                                  | 0.159  |
| Precore mutants, % (proportion)                              | 59.2% (74/125)                            | 40% (24/60)                                    | 0.014  |
| Cirrhosis, % (proportion)                                    | 8.1% (10/123)                             | 9.1% (5/55)                                    | 0.831  |
| Presence of HIV co-infection, % (proportion)                 | 32% (41/128)                              | 46.9% (30/64)                                  | 0.045  |
| Baseline CD4 cell count, cells/ $\mu$ L (range)              | 448 (151 – 1120)                          | 492 (112 – 1197)                               | 0.373  |
| Tenofovir pre-treatment HBV median viral load, IU/mL (range) | 1.6E+6 (20 – 1.6E+8)                      | 1E+8 (3.2E+5 – 1.6E+8)                         | 0.088  |
| End of follow up HBeAg loss, % (proportion)                  | 80.4% (37/46)                             | 27.3% (9/33)                                   | <0.001 |
| Overall HBV treatment duration in years, mean $\pm$ SD       | 7.53 $\pm$ 3.17                           | 9.87 $\pm$ 3.95                                | 0.642  |

Supplementary Table 1. Characteristic of patients based on treatment success.
